# Supplementary material
Source: PubMed Central journal article supplement (PMC1283493)
Supplement: cmaj_173_11_1315__1.pdf [file cmaj_173_11_1315__1.pdf]

**Box 1: Most common countries of origin of provisionally licensed international medical graduates in 2003 by province**

**British Columbia**

South Africa  
UK  
Ireland  
India  
Australia/Pakistan

**Alberta**

South Africa  
India/Pakistan  
Egypt/England

**Saskatchewan**

South Africa  
India  
Pakistan  
Nigeria

Libya

**Manitoba**

South Africa  
Greece  
USSR  
India

Iran

**Ontario\***

UK, India, South Africa,  
Egypt, Russia

**Quebec**

France  
Belgium  
Brazil  
Lebanon

Egypt

**New Brunswick†**

Philippines/India  
Egypt, Nigeria, Dominican Republic,  
Belarus, Jordan, Cameroon

**Nova Scotia**

Egypt  
India  
Sri Lanka  
Poland

Iraq

**PEI\***

Pakistan, India, South Africa, Ireland, UK,  
Hong Kong, Greece, Antilles, Jamaica,  
France, Tanzania, Columbia, Bangladesh

**Newfoundland and Labrador**

South Africa  
Pakistan  
India  
Egypt  
Libya  
Nigeria

\*Listed in no particular order.

†Listed in no particular order after Philippines/India.

Source: provincial medical boards.
